# Supplementary material for: Catalytic degradation of methylene blue using iron and nitrogen-containing carbon dots as Fenton-like catalysts
Source: Royal Society of Chemistry journal article supplement (doi:10.1039/d1nj04761b), 2021-11-11
Supplement: d1nj04761b1.pdf [file d1nj04761b1.pdf]

## **Supplementary data**

### **Catalytic degradation of methylene blue using iron and nitrogen-containing carbon dots as Fenton-like catalysts**

Sabrina A. Beker<sup>1\*</sup>, Leadin S. Khudur<sup>1</sup>, Ivan Cole<sup>2</sup> and Andrew S. Ball<sup>1</sup>

<sup>1</sup> School of Science, STEM College, RMIT University, Bundoora, VIC 3083, Australia

<sup>2</sup> Advanced Manufacturing and Fabrication, School of Engineering, RMIT University, Melbourne, VIC, 3000, Australia

\*corresponding author

E-mail address: [sabrina.beker@rmit.edu.au](mailto:sabrina.beker@rmit.edu.au)

Postal address: School of Science, RMIT University, Melbourne, Victoria, 3083, Australia.

**Table S1.** Levels and parameters utilised in the Taguchi method.

| <b>Factor</b> | <b>Name</b>                             | <b>Levels</b>          |
|---------------|-----------------------------------------|------------------------|
| <b>A</b>      | Temperature (°C)                        | 20; 30; 40; 50         |
| <b>B</b>      | pH                                      | 4.0; 6.0; 8.0; 10.0    |
| <b>C</b>      | Catalyst dose (mg mL <sup>-1</sup> )    | 0.17; 0.33; 0.50; 0.67 |
| <b>D</b>      | H <sub>2</sub> O <sub>2</sub> dose (mM) | 47; 98; 147; 196       |

**Table S2.** Combination of the 16 experiments generated by Taguchi method of experimental design.

| <b>Temperature</b> | <b>pH</b> | <b>Catalyst dose (mg mL<sup>-1</sup>)</b> | <b>H<sub>2</sub>O<sub>2</sub> dose (mM)</b> |
|--------------------|-----------|-------------------------------------------|---------------------------------------------|
| 20                 | 4         | 0.17                                      | 47                                          |
| 20                 | 6         | 0.33                                      | 98                                          |
| 20                 | 8         | 0.50                                      | 147                                         |
| 20                 | 10        | 0.67                                      | 196                                         |
| 30                 | 4         | 0.33                                      | 147                                         |
| 30                 | 6         | 0.17                                      | 196                                         |
| 30                 | 8         | 0.67                                      | 47                                          |
| 30                 | 10        | 0.50                                      | 98                                          |
| 40                 | 4         | 0.50                                      | 196                                         |
| 40                 | 6         | 0.67                                      | 147                                         |
| 40                 | 8         | 0.17                                      | 98                                          |
| 40                 | 10        | 0.33                                      | 47                                          |
| 50                 | 4         | 0.67                                      | 98                                          |
| 50                 | 6         | 0.50                                      | 47                                          |
| 50                 | 8         | 0.33                                      | 196                                         |
| 50                 | 10        | 0.17                                      | 147                                         |
